# Supplementary material for: SETD7 functions as a transcription repressor in prostate cancer via methylating FOXA1
Source: PubMed Central journal article supplement — Proc Natl Acad Sci U S A. 2023 Aug 7;120(33):e2220472120. doi: 10.1073/pnas.2220472120 (PMC10438836; doi:10.1073/pnas.2220472120), 2023-08-07
Supplement: pnas.2220472120.sapp.pdf [file pnas.2220472120.sapp.pdf]

## **Supplementary Information Inventory:**

**Figure S1**, related to Figure 1.

**Figure S2**, related to Figure 2.

**Figure S3**, related to Figure 2.

**Figure S4**, related to Figure 3.

**Figure S5**, related to Figure 3.

**Figure S6**, related to Figure 4.

**Figure S7**, related to Figure 5.

**Figure S8**, related to Figure 5.

**Figure S9**, related to Figure 5.

**Figure S10**, related to Figure 6.

**Figure S11**, related to Figure 6.

**Figure S12**, related to Figure 6.

**Figure S13**, related to Figure 7.

**Table S1**, related to Figures 5 and 6

**Supplementary Methods**

**Additional References**

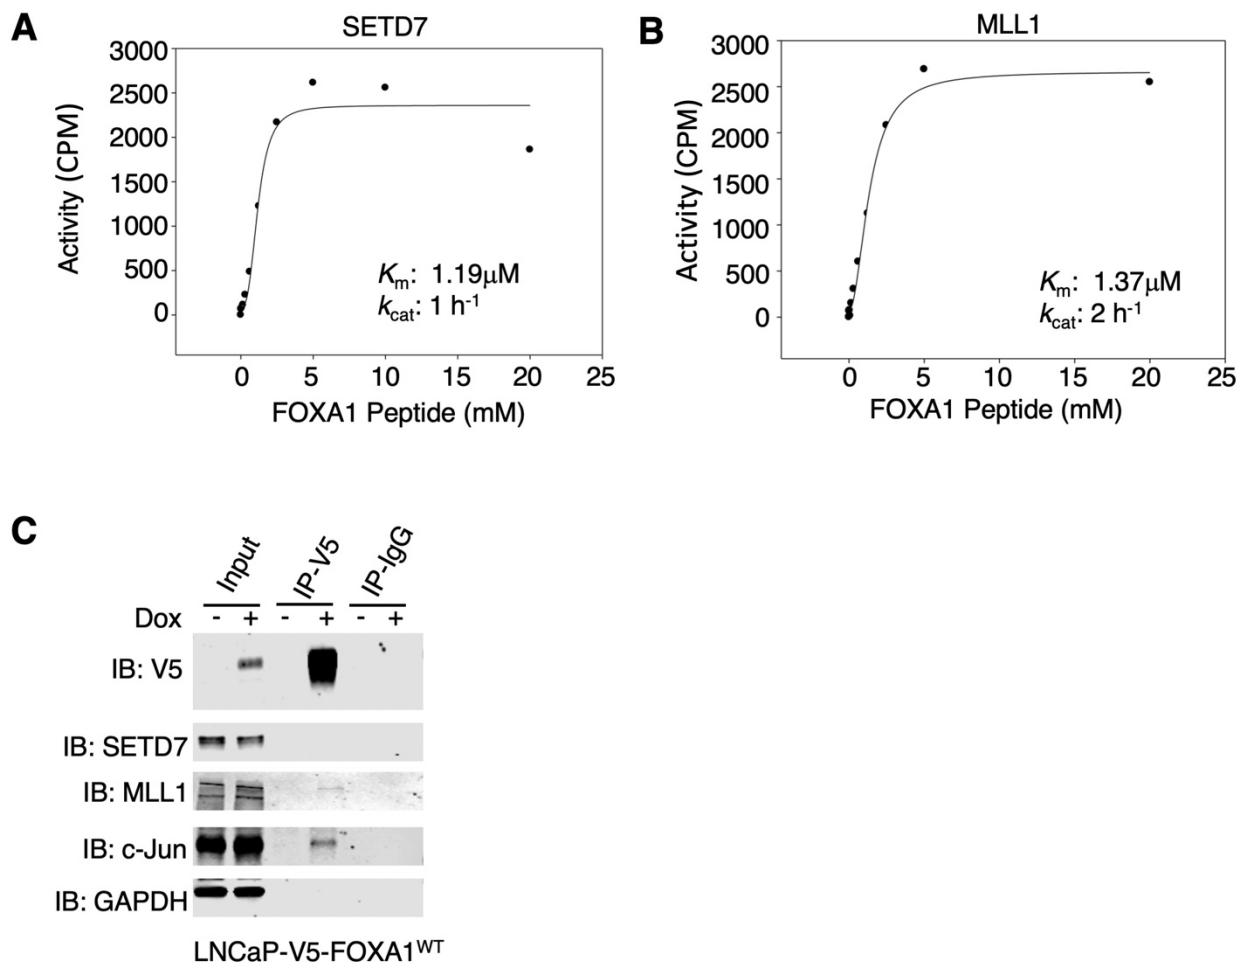

**Figure S1. Validation of SETD7 and MLL1 activity**

(A, B) Validation of SETD7 (A) and MLL1 (B) activity using 1 $\mu$ M methyltransferase proteins titrated at a series of FOXA1 peptide concentrations. (C) Immunoblotting for SETD7 and MLL1 in V5-FOXA1-overexpressing LNCaP cells immunoprecipitated with V5 and treated with or without doxycycline (0.5 $\mu$ g/ml).

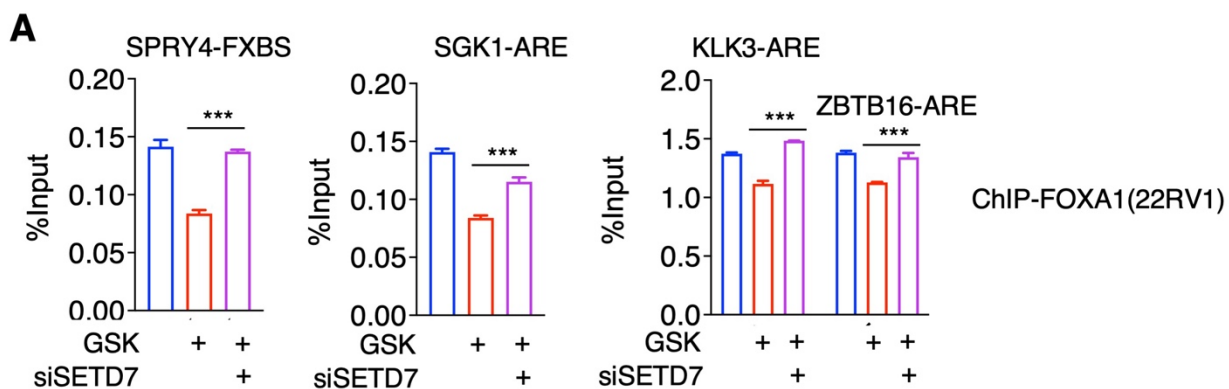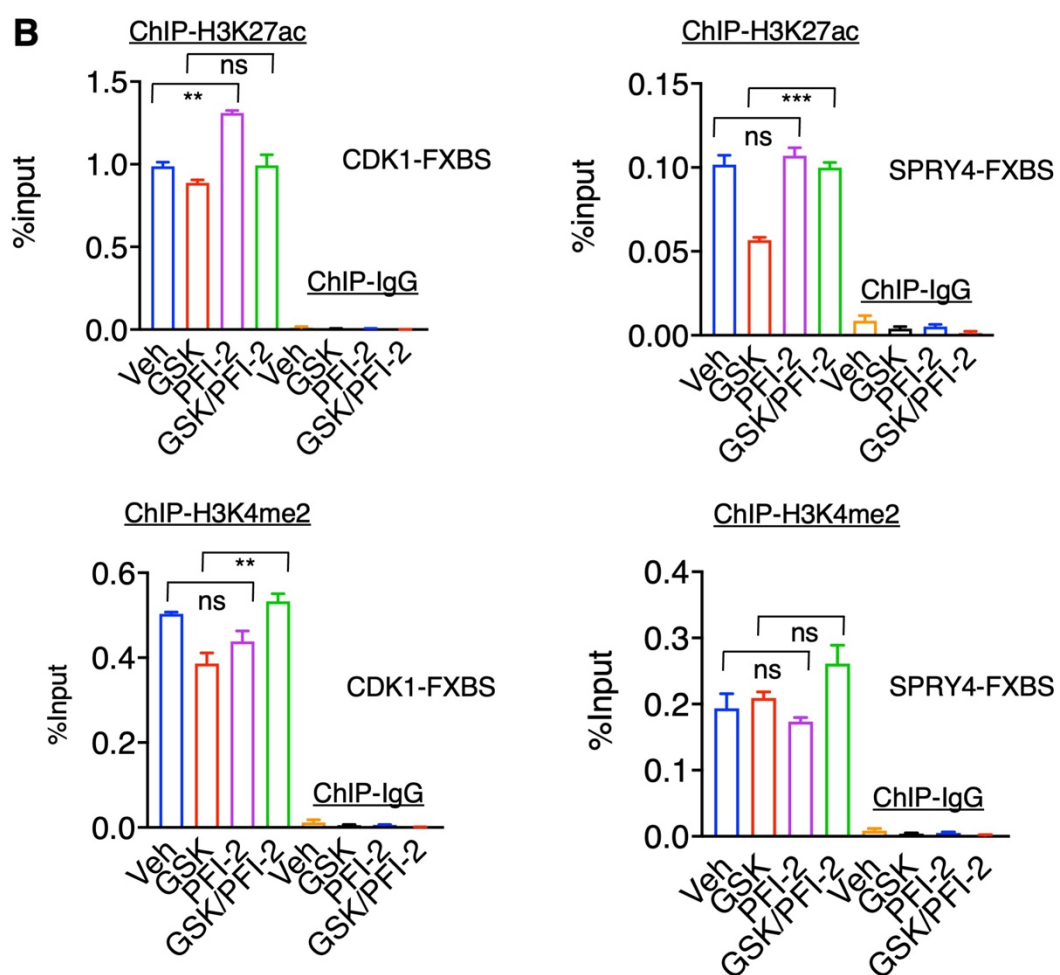

**Figure S2. Change of histone markers at FOXA1 binding sites in response to LSD1 and SETD7 inhibition**

(A) ChIP–qPCR for FOXA1 at indicated FOXA1 binding sites (FXBSs) in 22Rv1 cells transfected with or without siSETD7 and with or without LSD1 inhibitor (GSK2879552, 100 $\mu$ M). (B) ChIP–qPCR for H3K27ac and H3K4me2 at indicated FOXA1 binding sites in LNCaP treated with GSK2879552 (100 $\mu$ M) or PFI-2 (1 $\mu$ M) alone or the combination for 4h.

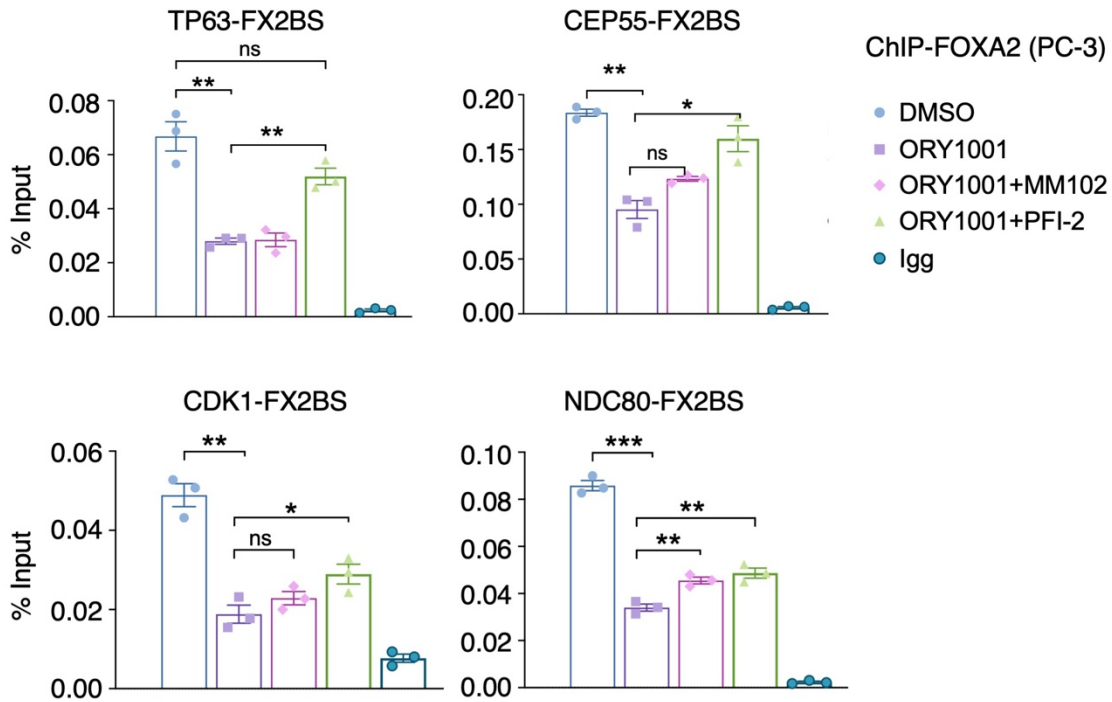

**Figure S3. SETD7 inhibition partially rescues LSD1-i-disrupted chromatin binding of FOXA2**

ChIP-qPCR for FOXA2 (antibody purchased from Millipore, 17-10258) at indicated FOXA2 binding sites (FX2BSs) in PC-3 cells treated with ORY1001 or its combination with MM102 (50 $\mu$ M) or PFI-2 (1 $\mu$ M) for 4h.

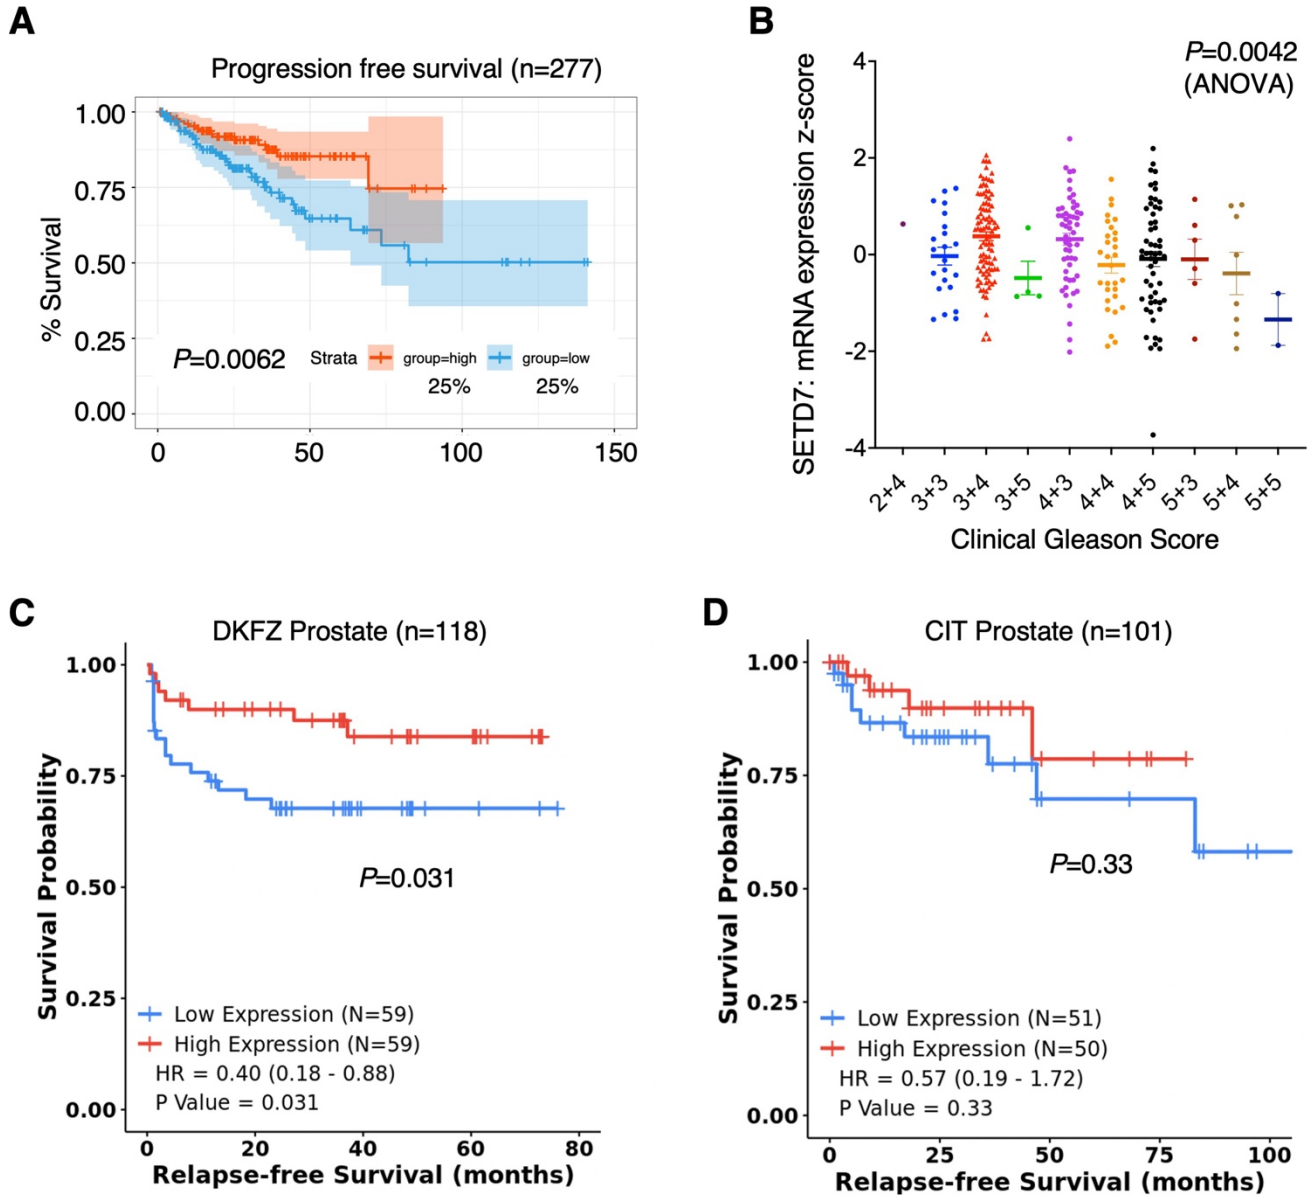

**Figure S4. Decreased SETD7 expression is associated with more aggressive PCa**

(A) Kaplan–Meier curve for the progression-free survival in the tumors with higher *SETD7* expression (red, the top 25%) versus with lower expression (blue, the bottom 25%) (TCGA dataset). (B) *SETD7* expression in PCa with different Gleason scores (TCGA). (C, D) Kaplan–Meier curve for the relapse-free survival in PCa tumors with higher *SETD7* expression (red, the top 50%) versus with lower expression (blue, the bottom 50%) in DKFZ (1) and CIT (2) datasets.

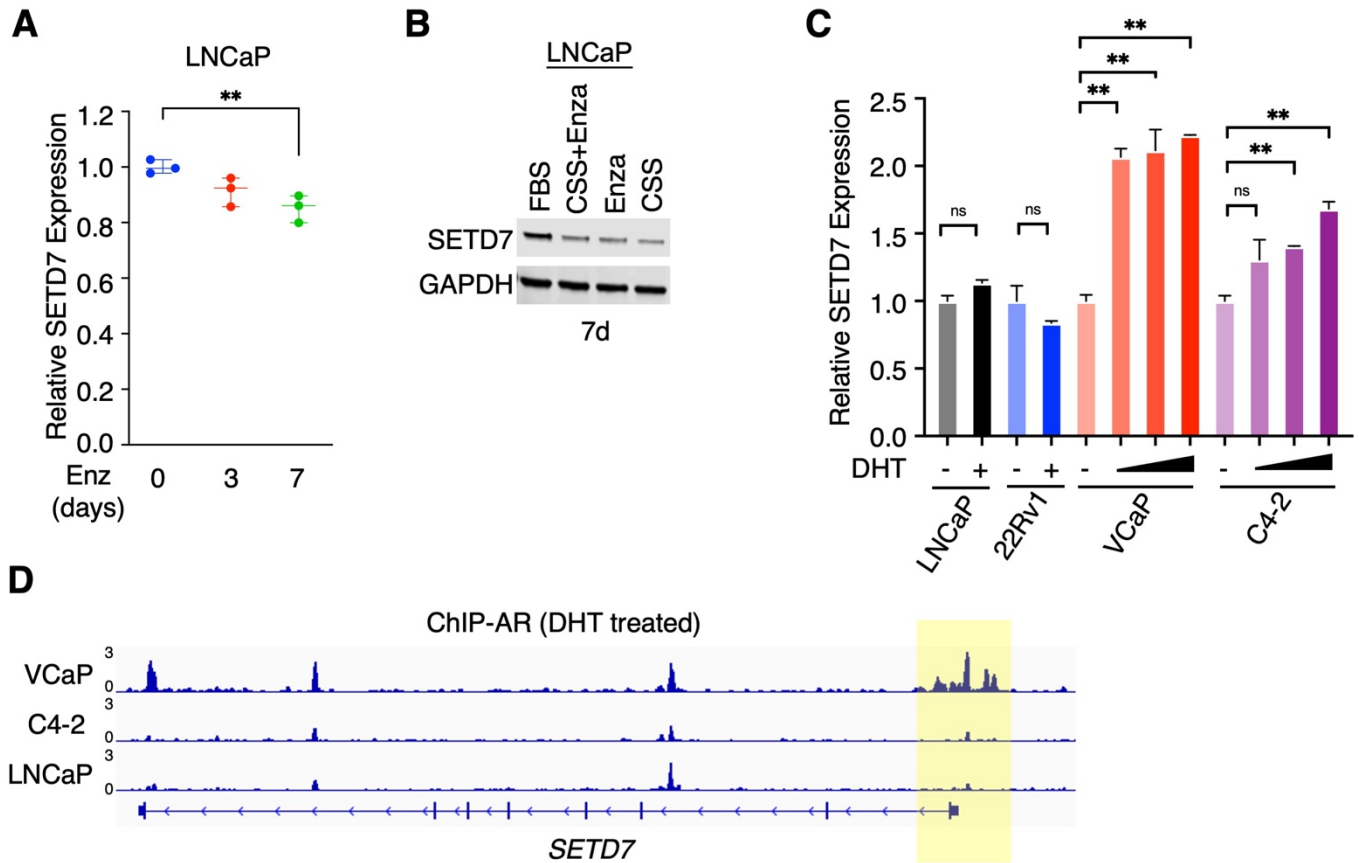

**Figure S5. SETD7 expression is decreased by androgen deprivation treatments**

(A) qRT-PCR for *SETD7* expression in LNCaP cells treated with enzalutamide (10 $\mu$ M) for 0, 3, or 7 days. (B) Immunoblotting for SETD7 in LNCaP cells treated with enzalutamide, hormone-depletion (CSS), or enzalutamide plus hormone-depletion. (C) qRT-PCR for *SETD7* expression in PCa cell lines treated with vehicle or DHT (10nM for LNCaP and 22Rv1; 0.1, 1, or 10nM for VCaP and C4-2). (D) Genome view of AR binding (ChIP-seq) in VCaP, C4-2, and LNCaP cells treated with 10nM DHT (3-5).

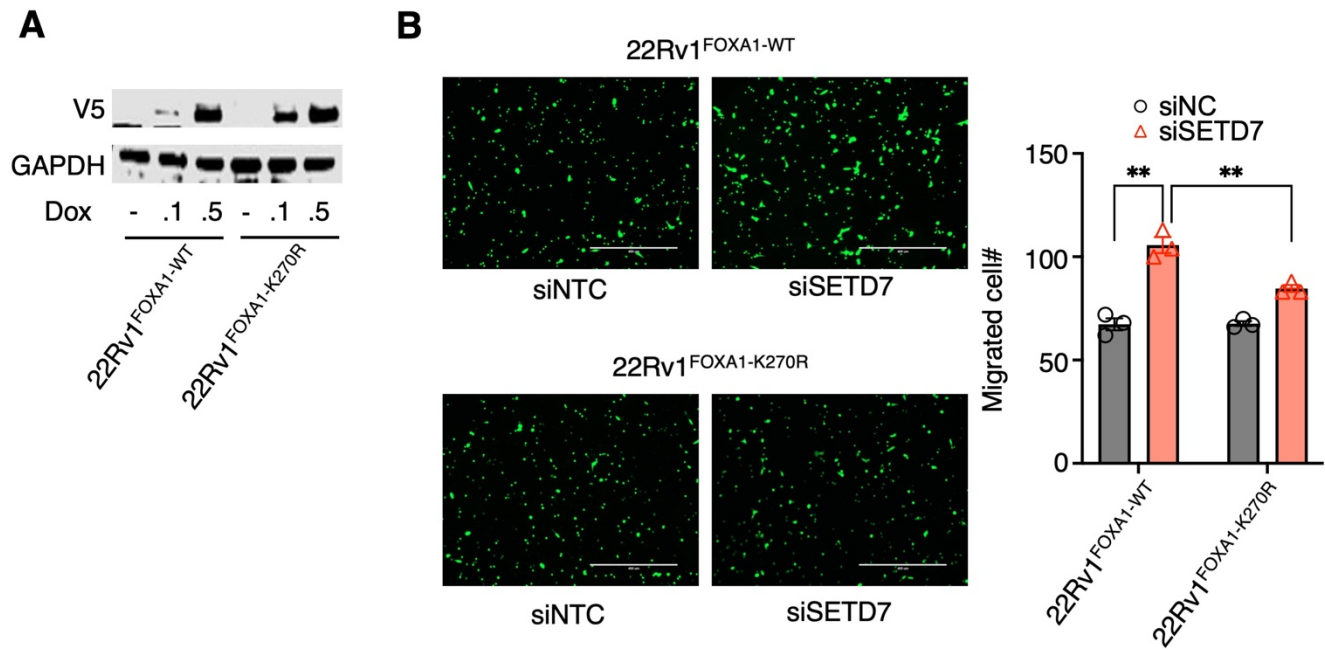

**Figure S6. SETD7 silencing induced cell migration is dependent on K270 methylation of FOXA1**

(A) Immunoblotting for V5 in V5-FOXA1<sup>WT</sup> or V5-FOXA1<sup>K270R</sup>-overexpressing (doxycycline-regulated) 22Rv1 cells treated with 0, 01, or 0.5μg/ml doxycycline. (B) Migration assay in these stable cells (induced with 0.5μg/ml doxycycline) transfected with siNTC or siSETD7.



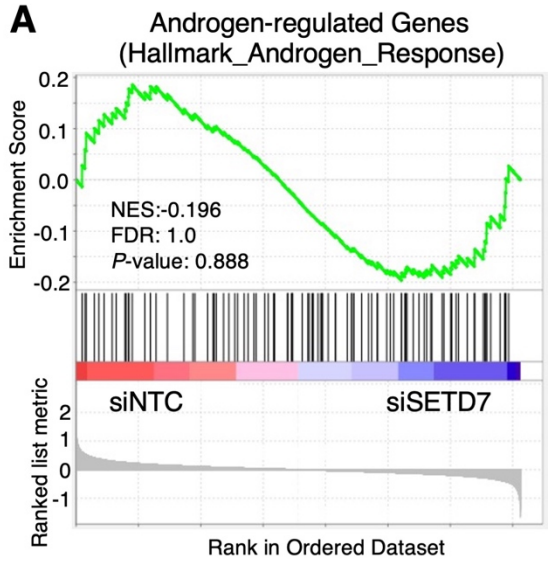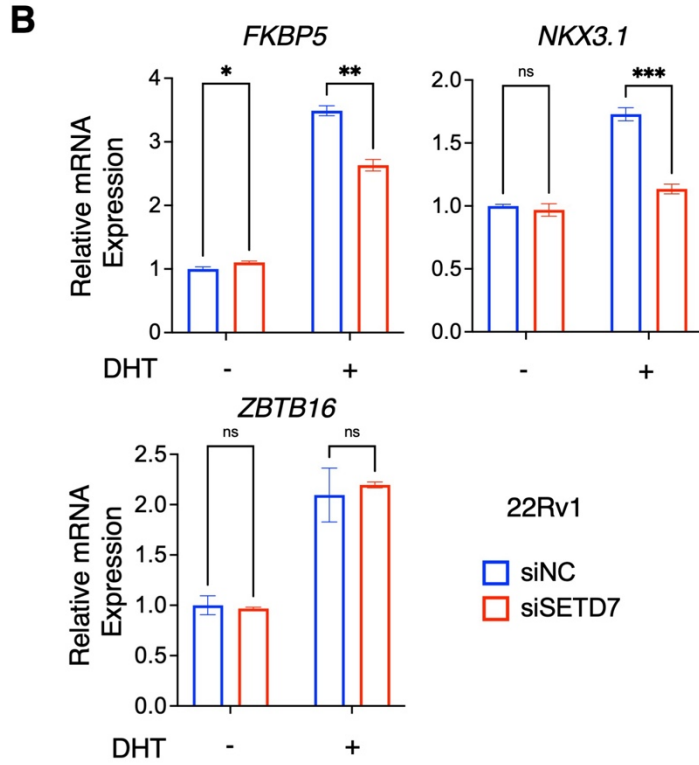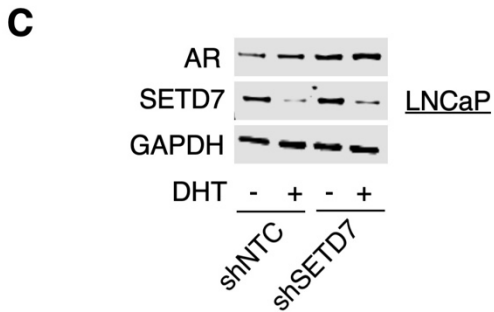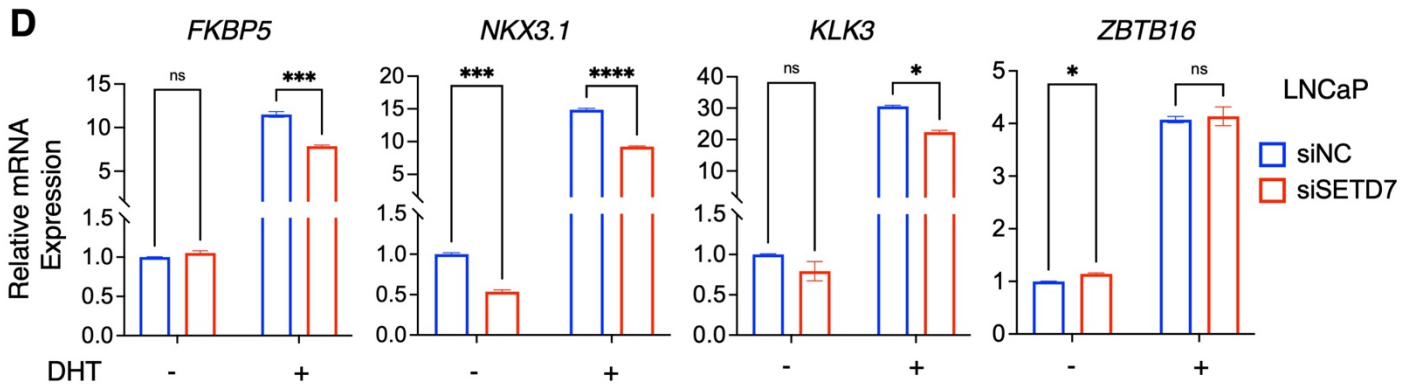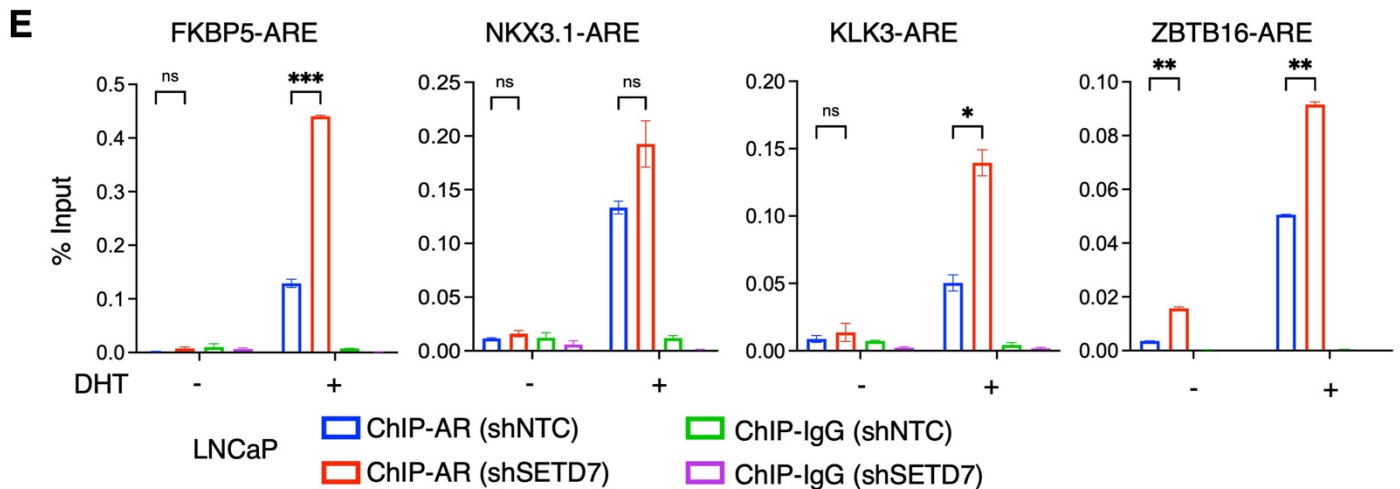

**Figure S7. SETD7 silencing enhances AR chromatin binding but not its transcriptional activity**

(A) GSEA of hallmark\_androgen\_response genes for SETD7-activated and repressed genes. (B, D) qRT-PCR for AR-regulated genes in 22Rv1 cells (B) or LNCaP cells (D) treated with/out DHT and transfected with siNTC or siSETD7. (C) Immunoblotting for AR and SETD7 in LNCaP cells stably infected with shNTC or shSETD7. (E) CHIP-qPCR of AR at indicated AR binding sites in LNCaP cells treated with/out DHT and stably infected with lentiviral shNTC or shSETD7.

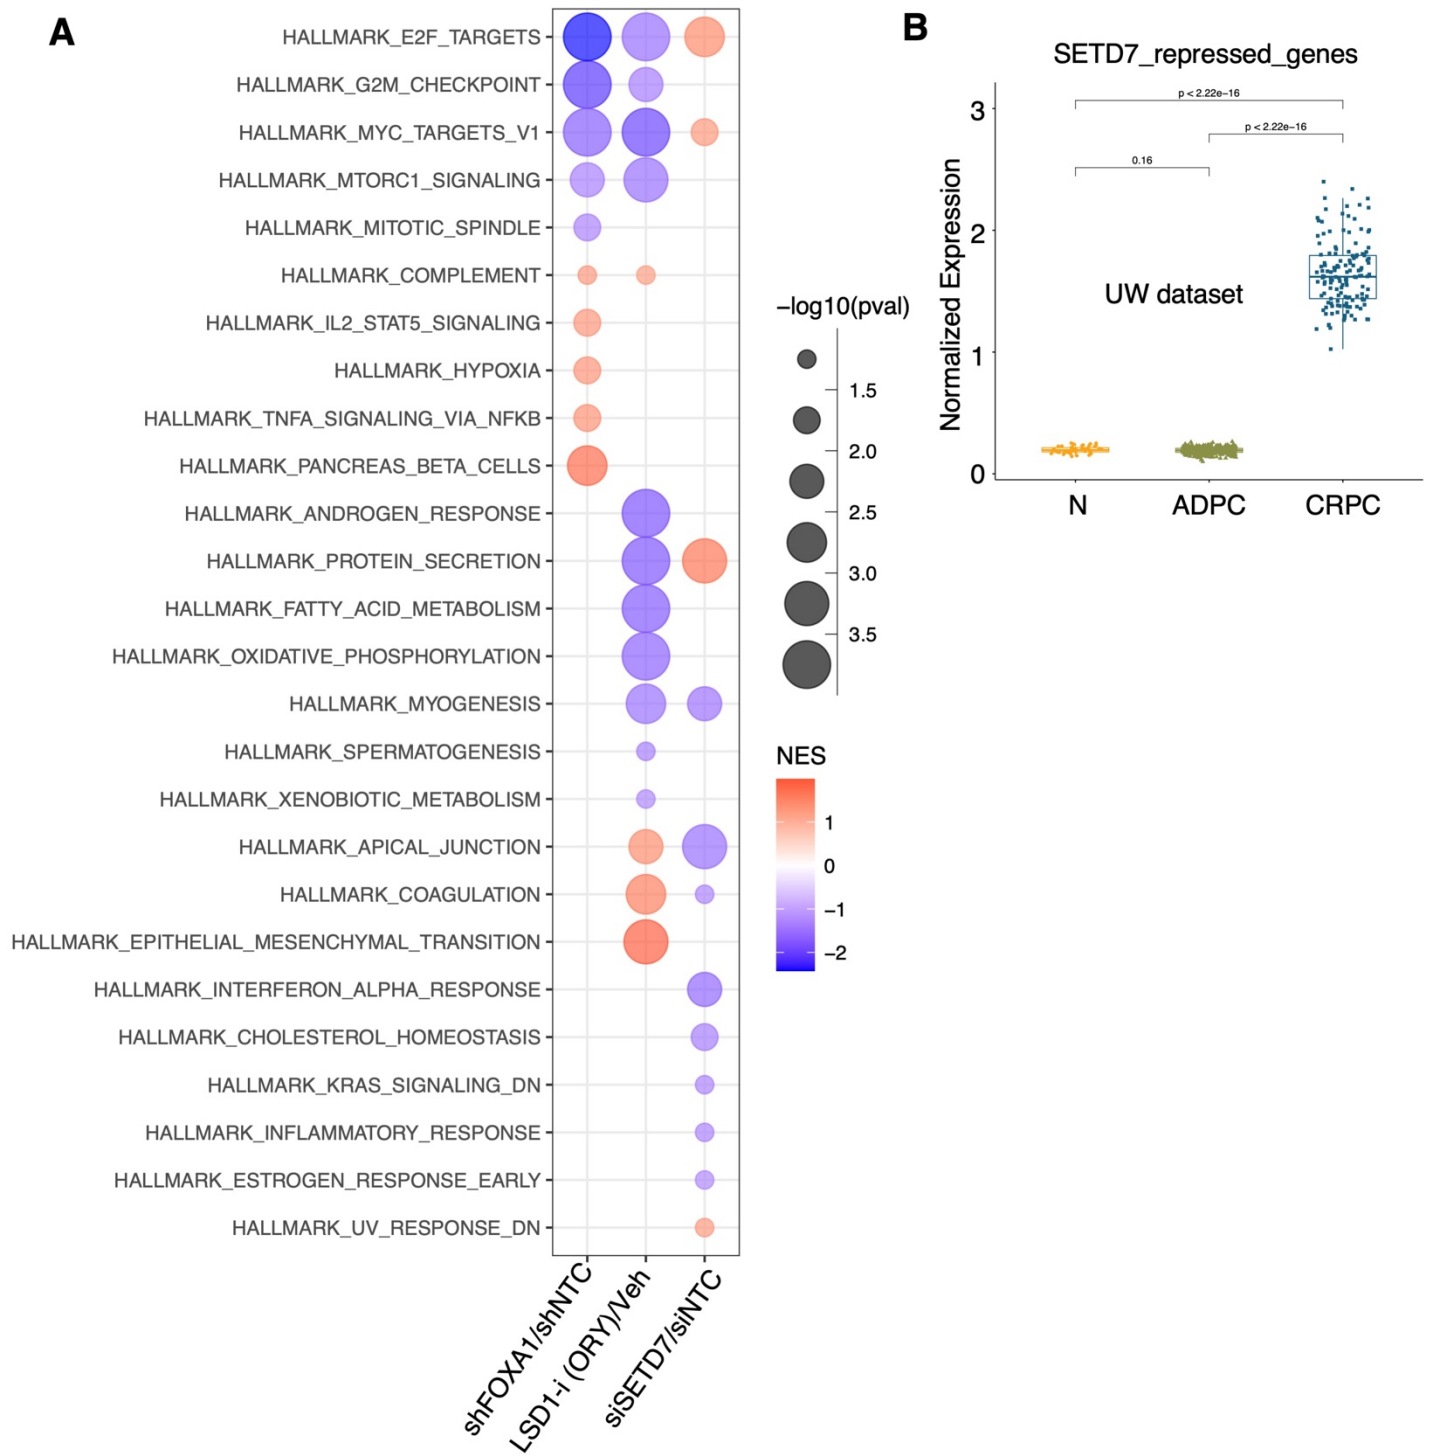

**Figure S8. SETD7 function is opposite to LSD1 and FOXA1**

(A) GSEA dot plot for shFOXA1 versus shNTC (GSE37314), LSD1 inhibitor (ORY-1001) vs vehicle-treated (GSE209889), and siSETD7 versus siNTC in 22Rv1 cells using hallmark gene sets. (B) SETD7-repressed genes in UW mCRPC dataset (6).

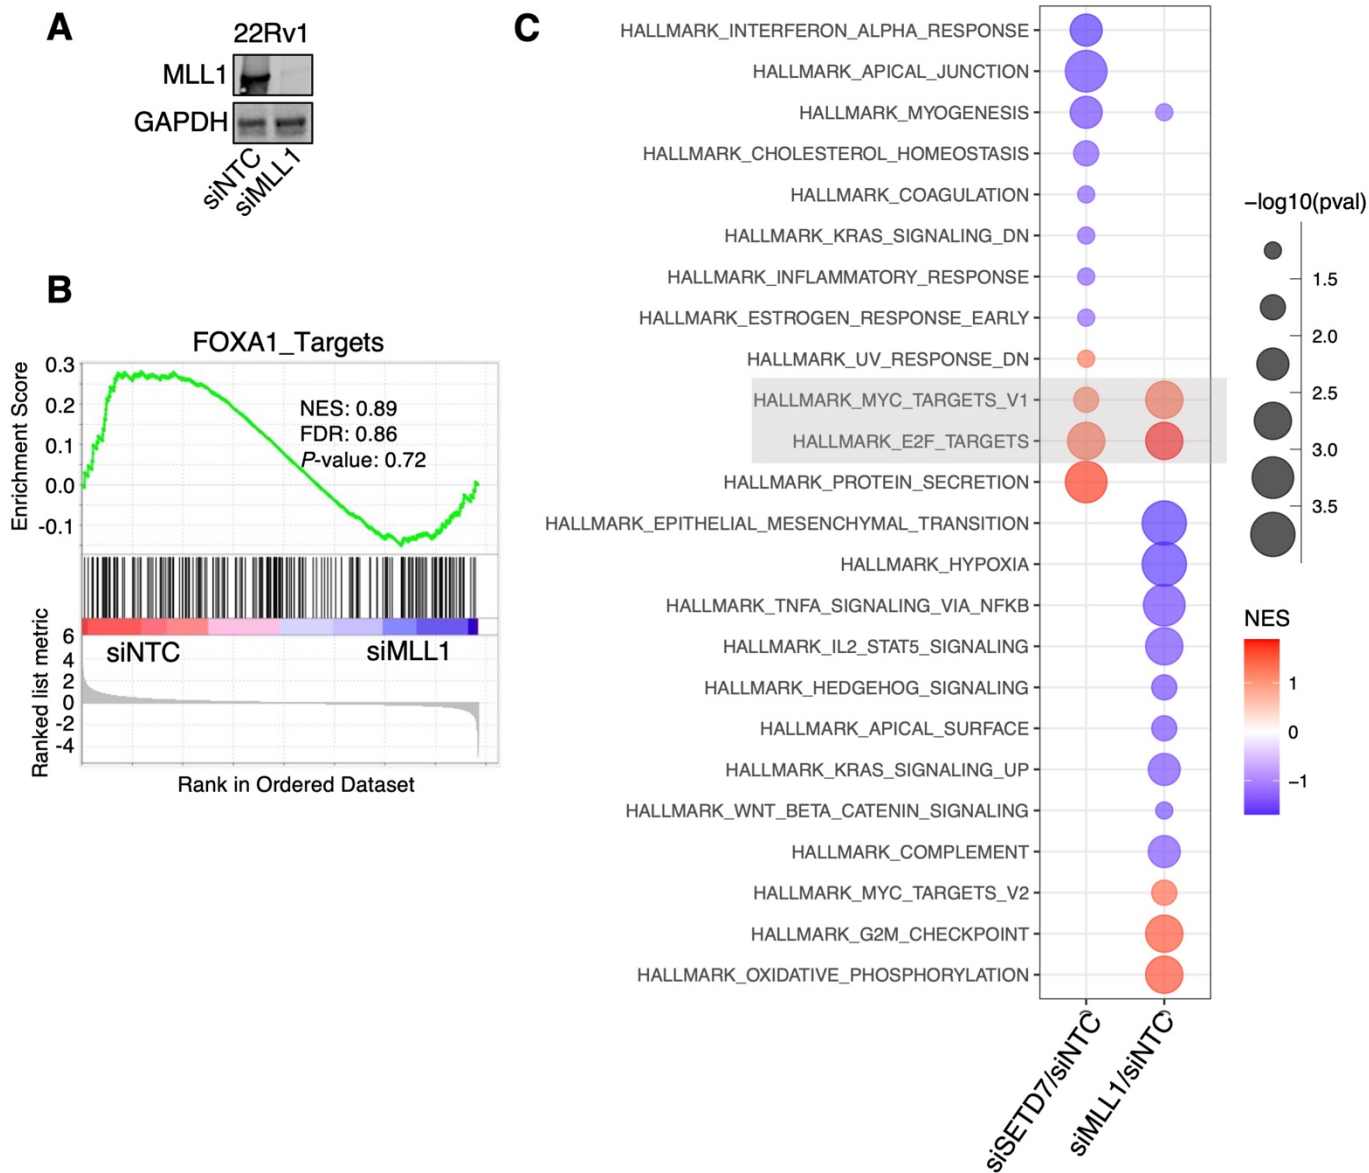

**Figure S9. MLL1-regulated genes are not enriched for FOXA1 targets.**

(A) Immunoblotting for MLL1 in 22RV1 cells transfected with siMLL1 or siNTC. (B) GSEA plot for the association of FOXA1 targets with siMLL-regulated genes. (C) GSEA dot plot for functional enrichment of differentially regulated genes in 22Rv1 cells transfected with siSETD7 versus siNTC or siMLL1 versus siNTC using hallmark gene sets.

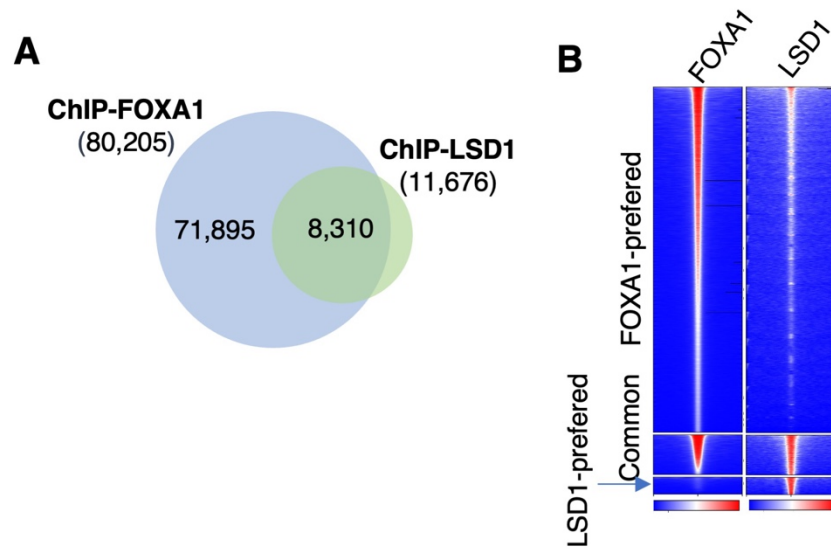

**Figure S10. FOXA1 and LSD1 chromatin bindings sites are overwhelmingly overlapped**

**(A)** Venn diagram for previously published ChIP-LSD1 peaks and ChIP-FOXA1 peaks in LNCaP cells. **(B)** Heatmap view for LSD1 binding and FOXA1 binding.

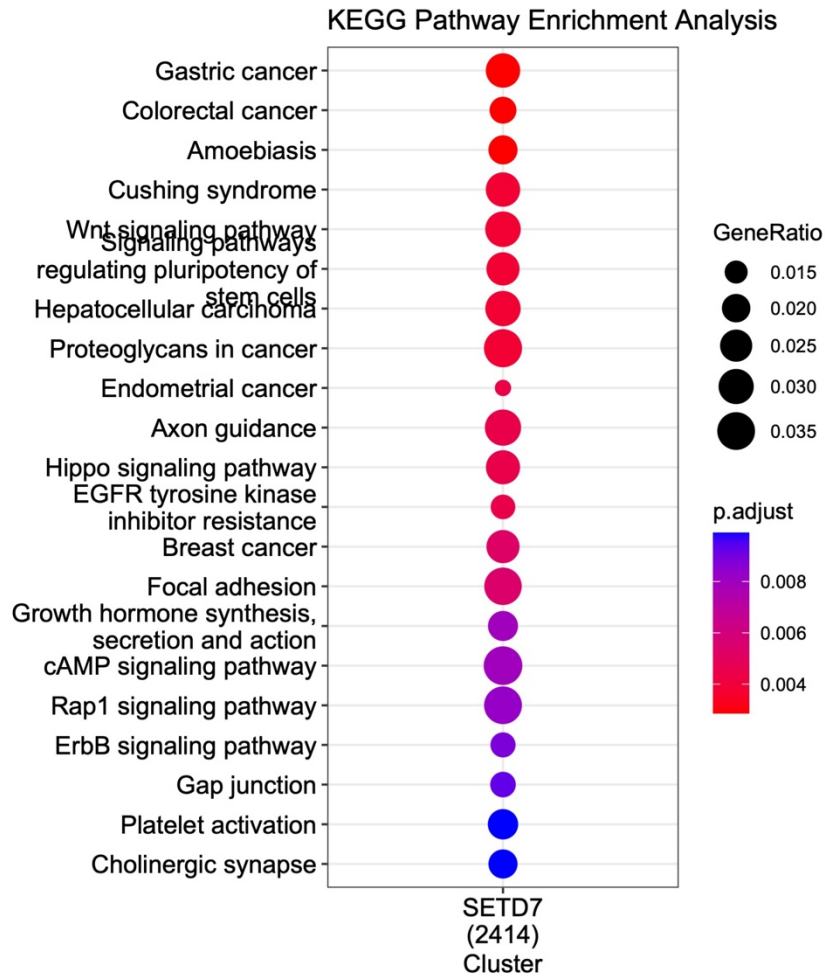

**Figure S11. SETD7 binding peaks are enriched for genes promoting cancer development**

KEGG pathway analysis for genes containing nearby SETD7 binding peaks.

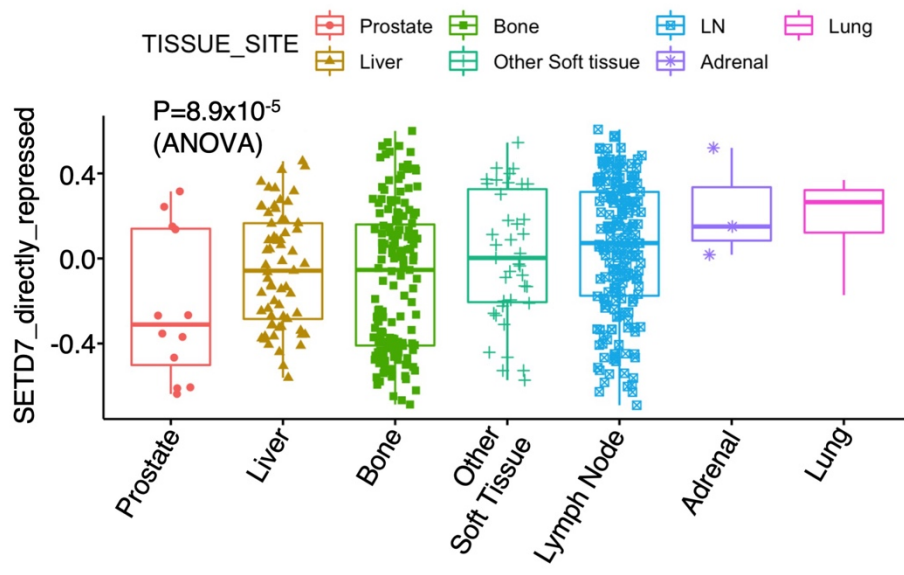

**Figure S12. SETD7-directly-repressed genes are highly expressed in metastasis sites**

Box plot for the average expression of identified SETD7-directly-repressed genes in metastasis sites of CRPC using SU2C dataset.



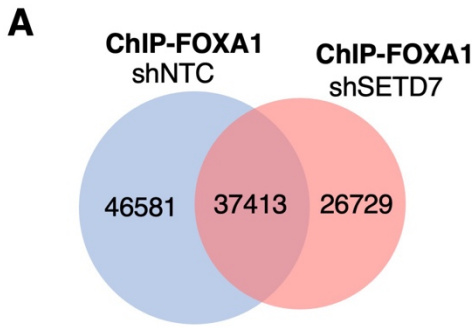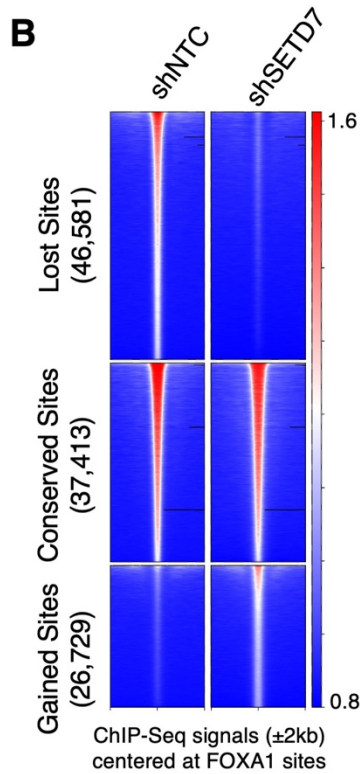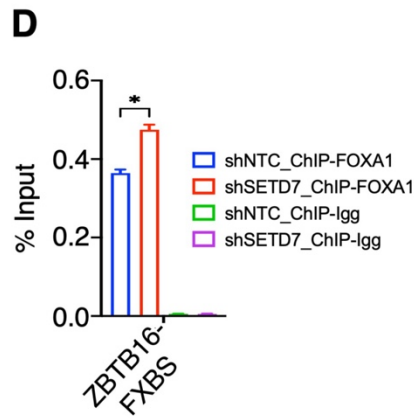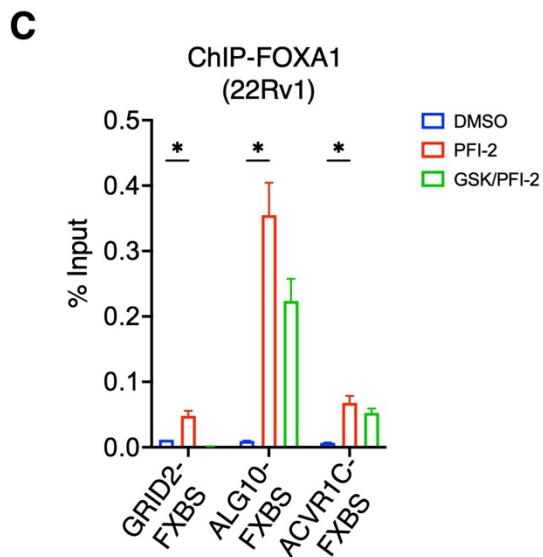

**E**

| Gene Name |           |          |         |
|-----------|-----------|----------|---------|
| GRID2     | LINC01192 | ZPLD1    | A2M     |
| ERC2      | MTMR7     | PTPRR    | COMMD10 |
| PEX5L     | STEAP1B   | ESRRG    | GUCY1A2 |
| ALG10     | SNX16     | SLC16A7  | PTGS2   |
| ZBBX      | LRR1Q1    | MICU3    |         |
| PRDM5     | ZBTB41    | LNC01205 |         |

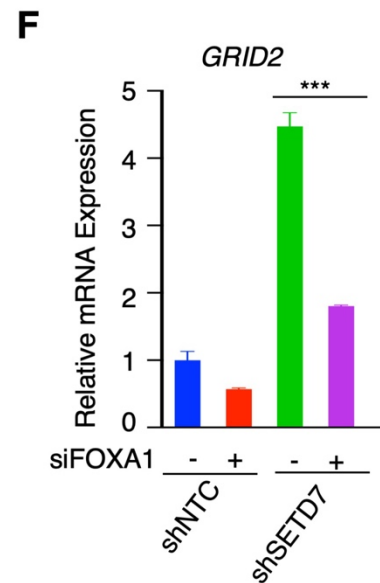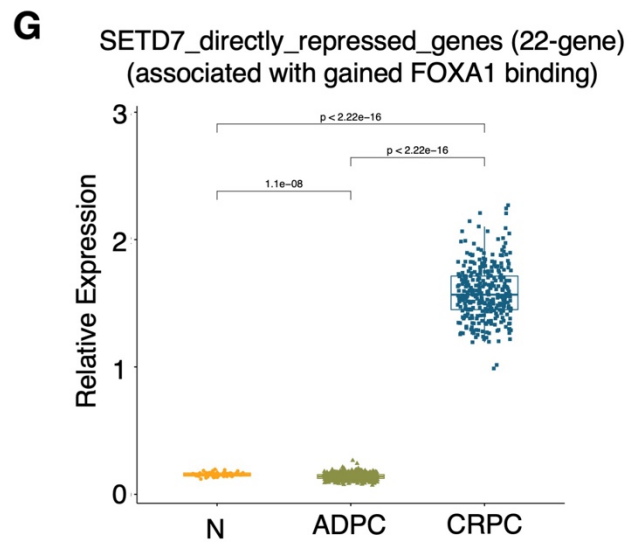

**Figure S13. FOXA1 is reprogrammed in PCa cells with loss of SETD7 expression**

(A) Venn diagram for FOXA1 binding sites (FOXA1 ChIP-seq) in 22Rv1 cells stably expressing shNTC or shSETD7. (B) Heatmap view for FOXA1 binding intensity at lost, reserved, and gained FOXA1 binding sites. (C) ChIP-qPCR of FOXA1 at gained sites in 22Rv1 cells treated with PFI-2 (1 $\mu$ M) or PFI-2 plus GSK2879552 (100 $\mu$ M). (D) ChIP-qPCR of FOXA1 at ZBTB16 enhancer (containing AR and FOXA1 binding motifs). (E) List of 22 SETD7-directly-repressed genes associated with gained FOXA1 binding. (F) qRT-PCR for *GRID2* expression in 22Rv1 stable cells with SETD7 silencing transfected with siNTC or siFOXA1. (G) Box plots for SETD7-directly-repressed genes in normal and primary PCa samples (TCGA) and mCRPC samples (SU2C).

| SETD7_Repressed<br>(2-fold) |               | SETD7-Activated<br>(2-fold) | SETD7_Directly_Repressed (BETA) |           |          |          |          |          |          |           |
|-----------------------------|---------------|-----------------------------|---------------------------------|-----------|----------|----------|----------|----------|----------|-----------|
| EIF1AXP1                    | YWHAZP10      | MMP23B                      | GUCY1A2                         | SNX10     | CAPZA2   | CAAP1    | EDEM3    | ZBTB37   | GPR160   | PBK       |
| LRRC7                       | MTMR8         | COL16A1                     | ZBTB41                          | FBXO28    | GAR1     | CSRP2    | C5orf24  | COMMD10  | SUCLG2   | AGPAT5    |
| CCT8P1                      | TBX22         | DLGAP3                      | UHMK1                           | CBX3      | MBNL1    | UBE3A    | PPP2R5A  | TRHDE    | SRPK2    | RYK       |
| FMO1                        | NOX1          | EDN2                        | TMED7                           | APPL1     | ANKIB1   | PGRMC2   | NDUFA5   | KRR1     | RAD51AP1 | ZNF704    |
| HSPE1P6                     | EIF4BP7       | H2AC20                      | PAWR                            | CCSAP     | ZMPSTE24 | OTUD6B   | PHTF2    | VASH2    | BNIP3    | ATAD1     |
| RPS15AP12                   | HAX1P1        | MPZ                         | CDC73                           | EIF2AK2   | FAM91A1  | DYRK2    | PAPOLA   | SMOC1    | FANCM    | UBP1      |
| SRP9                        | MTMR7         | PTPRVP                      | RAB21                           | KLHL24    | ZNF148   | IDE      | FZD3     | SMC4     | AMD1     | CRYZ      |
| LDHAP3                      | TNFRSF10A-AS1 | C2orf50                     | UCHL5                           | PPIP5K2   | ZHX1     | MIER3    | ENAH     | PAN3     | CEP63    | RMDN1     |
| NRXN1                       | CIBAR1        | IL36RN                      | MMP16                           | RRP15     | UBN2     | AGTPBP1  | RC3H1    | RAB4A    | MRPL42   | LEPROTL1  |
| PRELID1P6                   | NACA4P        | CCDC13                      | DEK                             | ECT2      | MTDH     | PRPF39   | DCUN1D1  | ARF4     | SLAIN1   | ZNF730    |
| FHL2                        | RMRP          | SETD7                       | TBL1XR1                         | HECA      | CNOT7    | ZNF780A  | KIF5B    | PTPN11   | PBRM1    | PIK3CB    |
| SNRPGP9                     | FRMPD1        | GMPR                        | BROX                            | BBX       | LIN7C    | EIF5A2   | RAB3IP   | G3BP2    | PRKAA1   | FGD5-AS1  |
| DARS1-AS1                   | MIR4477B      | RASA4DP                     | NEK7                            | ARPP19    | LDHA     | YWHAQ    | RYBP     | TMTC3    | DLD      | CAND1     |
| EFHB                        | KLF9          | CLDN23                      | ZBTB10                          | BRWD1     | UBE2D3   | TRNT1    | YES1     | CHML     | ZNF800   | EIF4G2    |
| ERC2                        | FSD1L         | CHCHD2P9                    | PPP1CB                          | PPP1CC    | SMG1     | EPM2AIP1 | HOOK1    | TMEM106B | GNAQ     | FGD6      |
| TF                          | C1QL3         | LMX1B                       | BNIP3L                          | FEM1C     | TOMM20   | MAP3K1   | KRAS     | ARL8B    | ZDBF2    | SRSF1     |
| ZBBX                        | ARL5B         | ENTPD8                      | CGGBP1                          | RPRD1A    | AEBP2    | PRKAR2B  | TAX1BP1  | ASPM     | FAM126A  | EPS15     |
| PEX5L                       | BMI1          | IFIT2                       | HGF                             | CCDC91    | HNRNPR   | TSPAN8   | PLEKHA8  | DENR     | SACM1L   | OXSRI     |
| CCDC39                      | RASSF4        | CREB3L1                     | PPP3CA                          | SLC16A7   | SLC2A13  | POC1B    | ATP6V1A  | DR1      | RHOBTB1  | SNX6      |
| B3GNT5                      | IPMK          | MYO7A                       | ZDHHC2                          | NRAS      | PUS7L    | FST      | SLC19A2  | HNRNPH3  | TFDP2    | MTMR2     |
| ABCA11P                     | EGR2          | IGFBP6                      | LRRCS8                          | MATR3     | CASD1    | CDK6     | FAM120A  | PHF3     | ELK4     |           |
| SRD5A3-AS1                  | AIFM2         | MIPEPP3                     | RALGPS2                         | AGO3      | EFNB2    | STRN3    | PSIP1    | SEMA3D   | C2CD5    | COMMD2    |
| EPHA5                       | SRP9P1        | NKX2-8                      | TMED5                           | NR1D2     | SESTD1   | CDC42SE2 | CACNA2D1 | LPGAT1   | BCAP29   | SMARCA5   |
| UGT2B15                     | C11orf65      | IGFALS                      | PTP4A1                          | PPP1R12A  | TBC1D5   | DENND6A  | RRM2B    | ZNF107   | TC2N     | TMEM126B  |
| GPRIN3                      | SLC6A12       | HIC1                        | TOP2B                           | TMEM263   | PDE12    | ACBD3    | BMI1     | TBC1D15  | CBLL1    | TRMT13    |
| GRID2                       | ETFRF1        | VMO1                        | LYPLA1                          | ZMAT3     | TNKS     | TMEM65   | ACAP2    | XPR1     | PLOD2    | PDS5A     |
| DNAJB14                     | TSPAN11       | GALR2                       | POU2F1                          | PARPBP    | UBA3     | LIN7A    | GXYLT1   | C21orf91 | ZNF92    | DIMT1     |
| FAM241A                     | ALG10         | ADAM33                      | CLASP2                          | ZNF678    | IMPA1    | ZNF680   | NAA50    | TMOD3    | PPM1L    | NCEH1     |
| PCDH18                      | CCDC184       | ADAT3                       | NUCKS1                          | BCLAF1    | ATP11B   | MFN1     | LPP      | RMI1     | TES      | ITGB8     |
| CBR4                        | PRANCR        | SYDE1                       | SLC25A36                        | RCOR3     | ABHD10   | FUBP1    | EXOC5    | FGFR1OP2 | FOXJ3    | SSX2IP    |
| LRP2BP                      | TRHDE         | IGLV1-51                    | PHIP                            | ALG10     | G3BP1    | PRKACB   | ALCAM    | IPO8     | RAD21    | BCAS2     |
| FST                         | RPL34P27      | LINC00634                   | LARP4                           | DDAH1     | ABCB10   | RCHY1    | YWHAZ    | XPO1     | STAU2    | STAG1     |
| RPL26P19                    | COX17P1       | IL17REL                     | DBF4                            | FMO1      | SCRN1    | ARIH1    | KCTD3    | RAB2A    | SOAT1    | TRMT10C   |
| CMYA5                       | BCL2L2-PABPN1 |                             | ARPC5                           | ARHGAP11A | FAM8A1   | LSM5     | CMTM6    | PGGT1B   | PCM1     | ZNF695    |
| RASGRF2                     | GMFB          |                             | YOD1                            | NFAT5     | ZNF518A  | VPS13A   | RNF141   | FOXP1    | KPNA4    | UBE2K     |
| POLR3G                      | DUOX1         |                             | TSNAX                           | CD2AP     | ANKRD12  | CHMP2B   | ZDHHC17  | UBE2W    | KDM5B    | PDCL      |
| TMED7                       | EID1          |                             | PANK3                           | SOCS4     | CPNE3    | SPTSSA   | DCUN1D4  | ELMOD2   | PEX2     | PICALM    |
| KRT8P33                     | IQCH          |                             | CPSF6                           | REST      | REEP3    | HLTF     | ATAD2    | TM9SF3   | RABEP1   | ARL15     |
| RAPGEF6                     | TM6SF1        |                             | SRP9                            | OSBPL8    | CEBPZOS  | DTWD2    | NDUFB5   | SDCBP    | KIF2A    | SIRT1     |
| CREBRF                      | RNU7-111P     |                             | DHX36                           | SKIL      | CNST     | PIGK     | MDM4     | NLGN1    | APC      | FAM135A   |
| CPNE5                       | SMG1P1        |                             | NAP1L1                          | MYBL1     | LMBR1    | DNM1L    | LBR      | LYSMD3   | HELLS    | EHPB1     |
| IMPG1                       | GAS8-AS1      |                             | PPP4R2                          | ZNF654    | RSBN1L   | KIAA1586 | ETNK1    | AGFG1    | PRKCI    | KBTD8     |
| FUT9                        | RPS27AP1      |                             | TWF1                            | DPY19L4   | GOLT1B   | USP14    | ATP13A3  | EEA1     | PIK3CA   | CCNE2     |
| EEF1A1P6                    | ASXL3         |                             | TNPO1                           | CLDND1    | CTDSPL2  | GOLGA4   | VAMP4    | AVL9     | LSM14A   | UHRF1BP1L |
| HOXA9                       | IER3IP1       |                             | PTEN                            | GTPBP8    | MKLN1    | TBK1     | TPD52    | DES12    | ZNF281   | DPY19L1   |
| CASD1                       | FTLP3         |                             | WASL                            | RB1CC1    | CCDC14   | ACVR2B   | AP3S1    | CUL5     | TMEM168  | ERGIC2    |
| TPI1P2                      | RPL12P4       |                             | PCNP                            | SEC62     | TDRP     | CEP290   | MYO6     | ATG12    | PTGES3   | ZDHHC20   |
| EEF1B2P6                    | RPL12P41      |                             | THAP5                           | CEP97     | NSUN3    | C1GALT1  | UBE2V2   | PHACTR2  | SCYL2    | RBBP8     |
| FAM131B                     | SNORD88A      |                             | TMPO                            | SRSF11    | MME      | TOPBP1   | PPP1R2   | POLR2M   | SDE2     | TMEM17    |
| AP1S2                       | RPL13AP7      |                             | IPMK                            | CDK14     | SMCHD1   | AP5M1    | ARID4B   | TRIM33   | PHC3     |           |
|                             | SH3BGR        |                             | XRN1                            | DENND1B   | NAA15    | UBQLN1   |          |          |          |           |

**Table S1. LIST of SETD7-regulated genes**

## SUPPLEMENTARY MATERIALS AND METHODS

### List of ChIP-qPCR primers:

|             |                                                                                      |
|-------------|--------------------------------------------------------------------------------------|
| KLK3-ARE    | Forward, 5'-GCCTGGATCTGAGAGAGATATCATC-3'<br>Reverse, 5'-ACACCTTTTTTTTTCTGGATTGTTG-3' |
| NKX3.1-ARE  | Forward, 5'-CTGGCAAAGAGCATCTAGGG-3'<br>Reverse, 5'-GGCACTTCCTGAGCAAACCTT-3'          |
| FKBP5-ARE   | Forward, 5'-CTCTCCAACCTGCACTCCAT-3';<br>Reverse, 5'-TAAAAGCACACAGGCGTGAA-3'          |
| ZBTB16-ARE  | Forward, 5'-ACACCATGGCCTGTTGTAAA-3'<br>Reverse, 5'-AAAACAGCAGACCCAAA-3'              |
| RAB11B-FXBS | Forward, 5'-ACTTACAGCAATGATGGGGAC-3'<br>Reverse, 5'-CCTGACCCATTGATCTGTTTGT-3'        |
| CDK1-FXBS   | Forward, 5'-TGCCTATCAGTAGTGCCCAA-3'<br>Reverse, 5'-GTTCAGAAGAGCAAACAAGGAA-3'         |
| SPRY4-FXBS  | Forward, 5'-GGCATCTGGCCTGGCATATAA-3'<br>Reverse, 5'-AACACAATGCATGGCACACAG-3'         |
| RET-FXBS    | Forward, 5'-CCCAAGGCAGAGGGCATAAG-3'<br>Reverse, 5'-CTGCTCGTCCTCTGAAAACCT-3'          |
| RUFY1-FXBS  | Forward, 5'-ACCAGCTTACTGGGTTTCAGAG-3'<br>Reverse, 5'-CCCATTATCTTGTGCGATTGCC-3'       |
| PDK1-FXBS   | Forward, 5'-GGTCAGCAAAGGCAAATGGC-3'<br>Reverse, 5'-CAAGGAAGCAAACAGCTGCC-3'           |
| GRID2-FXBS  | Forward, 5'-CTTGCAGCCTTTTCTGCGTT-3'<br>Reverse, 5'-AGAACACCAAGCCATGCGTA-3'           |
| ALG10-FXBS  | Forward, 5'-GTTTTGACACTTTGTGCGCC-3'<br>Reverse, 5'-GGATCCGGAAAGATCGGGTC-3'           |
| ACVR1C-FXBS | Forward, 5'-GGAGCCTCCGGGACTAGATA-3'<br>Reverse, 5'-CAATCGCCGCGTAGTTGAAG-3'           |
| NDC80-FX2BS | Forward, 5'-GCCATGAGTCACAGAAGGTTG-3'<br>Reverse, 5'-TCAGTGATAACCATAACCAAACCTGG-3'    |
| TP63-FX2BS  | Forward, 5'-ACTCATCTGTTTACCTTTTGCTGT-3'<br>Reverse, 5'-TGTGGTTCTGAGGCTGAGTG-3'       |
| WNT7A-FX2BS | Forward, 5'-GCGTCAGTGAATGGTTGCTG-3'<br>Reverse, 5'-AAACTGGTTCCTGCCATCAG-3'           |
| CDK1-FX2BS  | Forward, 5'-AAACAGCCTTCCAGGGAGTG-3'<br>Reverse, 5'-ATCCAAGTCAAAGGTAGCTGGA-3'         |

### List of shRNAs:

|           |                                           |
|-----------|-------------------------------------------|
| shSETD7-1 | Target sequence 5'-AATCCGTCATCGTCCAGGT-3' |
| shSETD7-2 | Target sequence 5'-AAATTTCCCATAAAGTGCG-3' |

### **List of antibodies used for immunoblotting**

Cells were boiled with 2%SDS, and proteins were detected with primary antibodies, including anti-V5 (Abcam, ab91116), anti-MLL1 (Abcam, ab243867), anti-FOXA1 (Abcam, ab23738), anti-SETD7 (CST, 2813S), anti-CoREST (Abcam, ab183711), anti-GAPDH (Abcam, ab8245), anti-H3K4me1(Abcam, 8895), anti-H3K4me2 (Millipore, 07-030), anti-H3K27ac (Abcam, ab4729), and anti-IgG (Millipore, 12-370). The gels shown are representative of at least three independent experiments.

### **ChIP-seq Analysis:**

For ChIP preparation, cells were fixed with 1% formaldehyde and lysed by the ChIP lysis buffer (1% SDS, 5mM EDTA, 50mM Tris-HCl pH 8.1). Chromatin was sheared to ~500-800bp fragments (for ChIP-qPCR) or ~300bp fragments (for ChIP-seq) using the Bioruptor Sonicator (Diagenode). Immunoprecipitation was performed using ChIP grade antibodies. The precipitated protein-DNA complexes were then reverse-crosslinked at 65°C, followed by DNA purification. The extracted DNA was subjected to ChIP-qPCR (primers are listed above) using the SYBR green method or ChIP-seq analysis. ChIP-seq libraries were constructed using the SMARTer ThruPLEX DNA-Seq Prep Kit (Takara Bio USA). Next-generation sequencing (51nt, single-end) was performed using Illumina HiSeq2500. ChIP-sequencing reads were mapped to the hg19 human genome using bwa (version 0.7.17-r1188) with aln and sampe sub-commands. Samtools (version 1.9) was used to convert SAM files to BAM format. The significance of enriched ChIP peaks was evaluated using MACS2 (version 2.1.4) (7). The Intervene (version 0.6.5) was used to analyze peak intervals, determine overlapped regions, and generate Venn diagrams. The signals associated with genomic regions were visualized using compueMatrix and plotHeatmap tools from deepTools (version 3.3.0). computeMatrix with reference-point mode was used to calculate scores for each genomic region, and plotHeatmap was used to create a heatmap for scores associated with genomic regions. Motif enrichment analysis was performed by using SeqPos with the default setting. Binding and Expression

Target Analysis (BETA) was performed by BETA software package (version 1.0.7) with default parameters to integrate CHIP-seq with differential gene expression data to predict direct targets. Antibodies used for CHIP were anti-SETD7 antibody (Cell signaling, 2813s), anti-FOXA1 (Abcam, ab23738), and anti-V5 (Thermo Fisher Scientific).

### **RNA-seq Analysis:**

RNA was extracted from cell lines with TRIzol reagent (Invitrogen) and RNA from tumor tissue samples was extracted using TissueLyser LT (Qiagen) and RNeasy Kit (Qiagen). Quantitative real-time PCR (qRT-PCR) was performed using Fast 1-step Mix (Thermo Fisher Scientific) on a QuantStudio 3 PCR machine. All qRT-PCR results were normalized to GAPDH and quantitated using  $\Delta\Delta C_t$  method. Taqman primers and probes for *SETD7*, *GRID2*, *ALG10*, *ACVR1C*, and *GAPDH* were predesigned and obtained from Thermo Fisher Scientific. For RNA-seq, the library preparation was performed using the TruSeq Strand Total RNA LT (Illumina). Next-generation sequencing (51nt, single-end) was performed using Illumina HiSeq2500. Transcriptome-sequencing reads were aligned to the human reference genome (hg19) using STAR (version 2.7.1a) and counted with featureCounts (version 2.0.1) from GRCh37 Ensembl reference. All gene counts were processed with the R package Edger (3.36.0) to evaluate differential expression using the Benjamini–Hochberg false discovery rate (FDR)-adjusted *P*-value. The expression values were centered and scaled across samples and then displayed using the ComplexHeatmap (version 2.10.0) R package. Volcano plot analysis was performed using SeqPos with the default setting in Galaxy/Cistrome. Gene Set Enrichment Analysis (GSEA) was conducted using the GSEA software (version 4.2.2) and the R package fgsea (version 1.20.0).

### **ADDITIONAL REFERENCES**

1. C. Gerhauser *et al.*, Molecular Evolution of Early-Onset Prostate Cancer Identifies Molecular Risk Markers and Clinical Trajectories. *Cancer Cell* **34**, 996-1011 e1018 (2018).
2. A. Kamoun *et al.*, Comprehensive molecular classification of localized prostate adenocarcinoma reveals a tumour subtype predictive of non-aggressive disease. *Ann Oncol* **29**, 1814-1821 (2018).
3. C. Cai *et al.*, ERG induces androgen receptor-mediated regulation of SOX9 in prostate cancer. *J Clin Invest* **123**, 1109-1122 (2013).

4. S. Gao *et al.*, Chromatin binding of FOXA1 is promoted by LSD1-mediated demethylation in prostate cancer. *Nat Genet* **52**, 1011-1017 (2020).
5. W. Han *et al.*, Exploiting the tumor-suppressive activity of the androgen receptor by CDK4/6 inhibition in castration-resistant prostate cancer. *Mol Ther* **30**, 1628-1644 (2022).
6. M. D. Nyquist *et al.*, Combined TP53 and RB1 Loss Promotes Prostate Cancer Resistance to a Spectrum of Therapeutics and Confers Vulnerability to Replication Stress. *Cell Rep* **31**, 107669 (2020).
7. Y. Zhang *et al.*, Model-based analysis of ChIP-Seq (MACS). *Genome Biol* **9**, R137 (2008).
